# Supplementary material for: The Paradoxical Role of Circulating Ketone Bodies in Glycemic Control of Individuals with Type 2 Diabetes: High Risk, High Reward?
Source: MDPI journal article supplement (doi:10.3390/biom12091318), 2022-09-18

**Supplemental Table S1. Diabetes treatment stratified longitudinal associations between fasting KB and annual HbA1c change in linear mixed models in ZODIAC**

|         | Diet alone (n=29)                | <i>p</i> | OBGLD (n=152)                    | <i>p</i>    | Insulin (n=21)                   | <i>p</i> | OBGLD and insulin (n=18)         |      |
|---------|----------------------------------|----------|----------------------------------|-------------|----------------------------------|----------|----------------------------------|------|
|         | <b>KB</b><br><i>per doubling</i> |          | <b>KB</b><br><i>per doubling</i> |             | <b>KB</b><br><i>per doubling</i> |          | <b>KB</b><br><i>per doubling</i> |      |
|         | B<br>(95% CI)                    |          | B<br>(95% CI)                    |             | B<br>(95% CI)                    |          | B<br>(95% CI)                    |      |
| Crude   | -0.27 (-0.79 – 0.26)             | 0.31     | <b>-0.11 (-0.20 - -0.01)</b>     | <b>0.03</b> | 0.17 (-0.05 – 0.39)              | 0.15     | -0.08 (-0.42 – 0.25)             | 0.61 |
| Model 1 | -0.19 (-0.75 – 0.38)             | 0.51     | <b>-0.11 (-0.21 - -0.01)</b>     | <b>0.03</b> | 0.15 (-0.10 – 0.40)              | 0.24     | -0.08 (-0.45 – 0.29)             | 0.67 |
| Model 2 | -0.22 (-0.80 – 0.35)             | 0.44     | <b>-0.11 (-0.21 - -0.01)</b>     | <b>0.03</b> | 0.18 (-0.15 – 0.51)              | 0.28     | -0.07 (-0.46 – 0.31)             | 0.70 |
| Model 3 | -0.30 (-0.92 – 0.32)             | 0.33     | <b>-0.10 (-0.20 - -0.00)</b>     | <b>0.05</b> | 0.19 (-0.14 – 0.53)              | 0.25     | -0.06 (-0.58 – 0.45)             | 0.81 |
| Model 4 | -0.37 (-1.02 – 0.28)             | 0.26     | <b>-0.11 (-0.21 - -0.00)</b>     | <b>0.05</b> | 0.21 (-0.19 – 0.61)              | 0.30     | -0.08 (-0.53 – 0.37)             | 0.72 |

Crude

Model 1: adjusted for age and gender and baseline HbA1c

Model 2: Model 1 + BMI and systolic blood pressure

Model 3: Model 2 + eGFR, smoking and total cholesterol/HDL ratio

Model 4: Model 3 + T2D duration + C-reactive protein

Linear mixed model analyses were performed in all individuals with  $\geq 2$  HbA1c measurements. A p-value of  $<0.05$  was considered statistically significant. All models were adjusted for time as main fixed factor in linear mixed model analyses. The estimates and p-values for the interactions of KB with time are depicted. Coefficients represent the yearly change in HbA1c (%) levels per doubling of KB.

*KB*: ketone bodies; *HbA1c* glycated haemoglobin; *T2D*: type 2 diabetes; *BMI*: body mass index; *eGFR*: estimated glomerular filtration rate; *HDL*: high density lipoprotein.

**Supplemental Table S2. Longitudinal associations between fasting plasma KB and annual fasting glucose change in linear mixed model analyses in PREVEND**

|         | <b>Total ketone bodies</b><br><i>Per doubling</i> | <b>p</b>    | <b>β-OHB</b><br><i>Per doubling</i> | <b>p</b>    | <b>Acetoacetate</b><br><i>Per doubling</i> | <b>p</b>    | <b>Acetone</b><br><i>Per doubling</i> | <b>p</b> |
|---------|---------------------------------------------------|-------------|-------------------------------------|-------------|--------------------------------------------|-------------|---------------------------------------|----------|
|         | B (95% CI)                                        |             | B (95% CI)                          |             | B (95% CI)                                 |             | B (95% CI)                            |          |
| Model 1 | <b>-0.09 (-0.15 – -0.02)</b>                      | <b>0.01</b> | <b>-0.08 (-0.15 - -0.02)</b>        | <b>0.01</b> | <b>-0.06 (-0.11 - -0.01)</b>               | <b>0.02</b> | -0.04 (-0.09 – 0.01)                  | 0.12     |
| Model 2 | <b>-0.09 (-0.16 – -0.02)</b>                      | <b>0.02</b> | <b>-0.08 (-0.15 - -0.02)</b>        | <b>0.02</b> | <b>-0.06 (-0.11 - -0.01)</b>               | <b>0.03</b> | -0.03 (-0.09 – 0.02)                  | 0.20     |
| Model 3 | <b>-0.09 (-0.14 – -0.01)</b>                      | <b>0.02</b> | <b>-0.08 (-0.13 - -0.01)</b>        | <b>0.03</b> | <b>-0.05 (-0.10 - -0.00)</b>               | <b>0.04</b> | -0.02 (-0.07 – 0.03)                  | 0.39     |
| Model 4 | <b>-0.09 (-0.16 – -0.02)</b>                      | <b>0.01</b> | <b>-0.08 (-0.15 - -0.02)</b>        | <b>0.01</b> | <b>-0.06 (-0.11 - -0.01)</b>               | <b>0.02</b> | -0.04 (-0.09 – 0.01)                  | 0.11     |
| Model 5 | <b>-0.09 (-0.15 – -0.02)</b>                      | <b>0.01</b> | <b>-0.08 (-0.14 - -0.01)</b>        | <b>0.02</b> | <b>-0.06 (-0.11 - -0.01)</b>               | <b>0.02</b> | -0.04 (-0.09 – 0.01)                  | 0.13     |

Model 1: adjusted for age and gender and baseline glucose

Model 2: Model 1 + time-updated T2D therapy and baseline plasma insulin concentration

Model 3: Model 2 + time-updated eGFR, systolic blood pressure and use of antihypertensive drugs

Model 4: Model 2 + time-updated BMI, smoking and alcohol use

Model 5: Model 2 + time updated total cholesterol/HDL ratio

Linear mixed model analyses were performed in all individuals with  $\geq 2$  fasting glucose measurements. A p-value of  $<0.05$  was considered statistically significant. All models were adjusted for time as main fixed factor in linear mixed model analyses. The estimates and p-values for the interactions of KB with time are depicted. Coefficients represent the yearly change in fasting glucose levels (mmol/L) per doubling of KB.

*KB*: ketone bodies; *HbA1c* glycated haemoglobin; *β-OHB*: β-hydroxybutyrate; *T2D*: type 2 diabetes; *BMI*: body mass index; *eGFR*: estimated glomerular filtration rate; *HDL*: high density lipoprotein.

Supplemental Figure S1. Graphical illustration of the association between KB according to tertiles at baseline and HbA1c at baseline and over time (average).

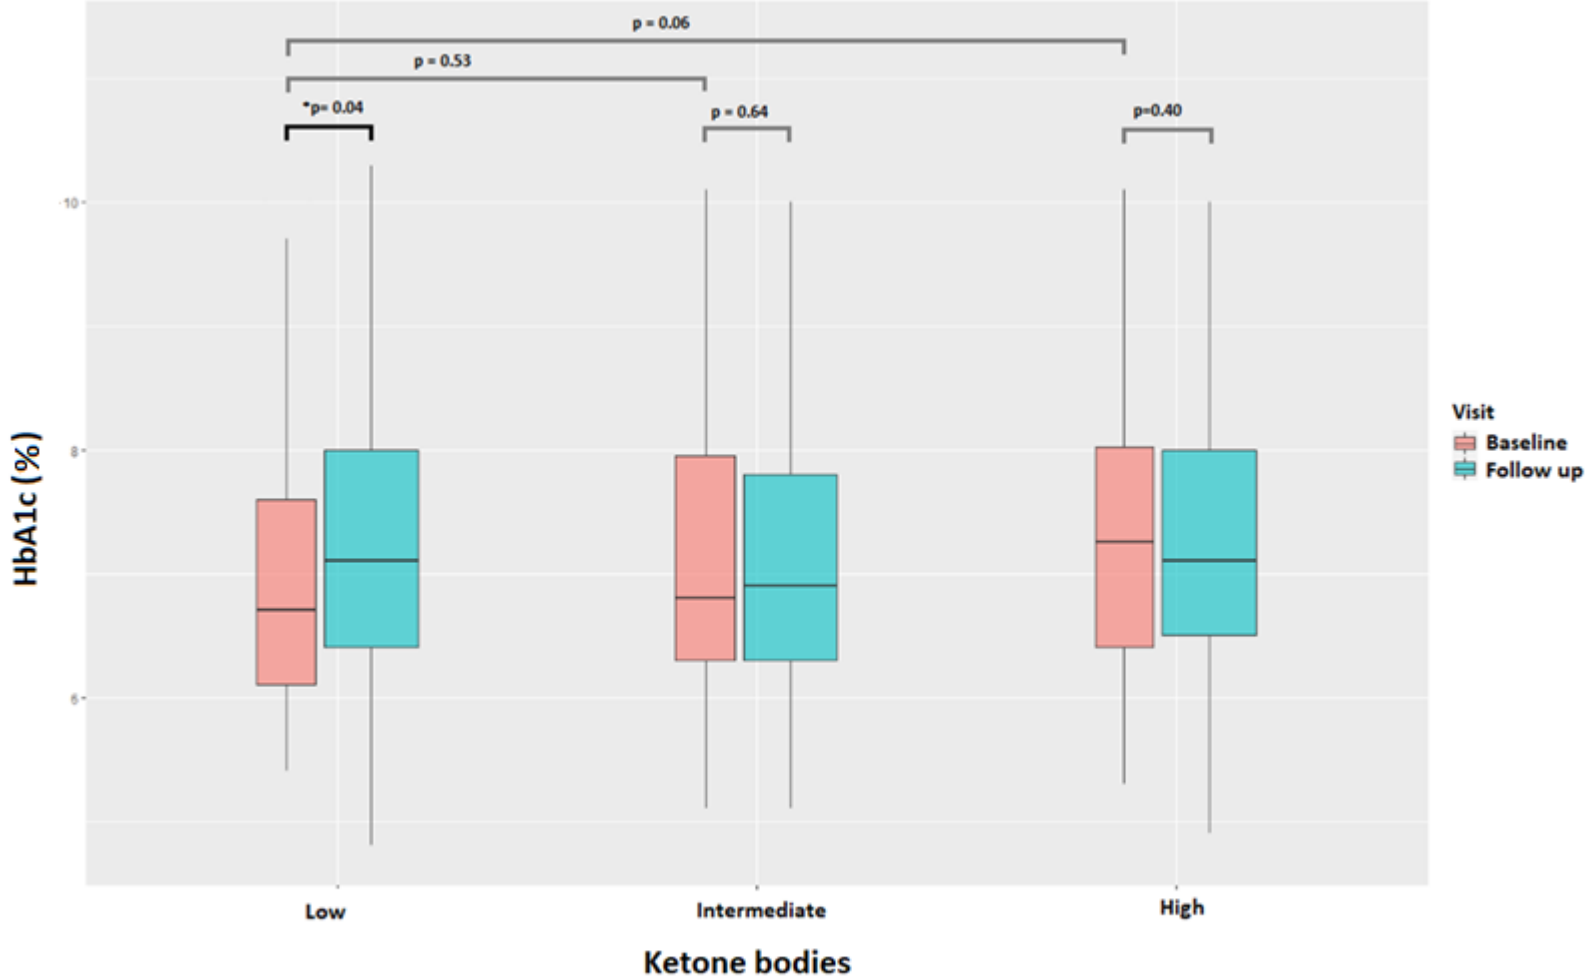

Supplement: s1 [file s1]
